# Supplementary material
Source: Royal Society of Chemistry journal article supplement (doi:10.1039/d6nh00116e)
Supplement: d6nh00116e1.pdf [file d6nh00116e1.pdf]

## **Supporting Information**

for

**Mechanistic insights into electrochemical nitrate reduction over *d*-  
and *p*-block Cu-based single-atom alloy catalysts: A DFT study**

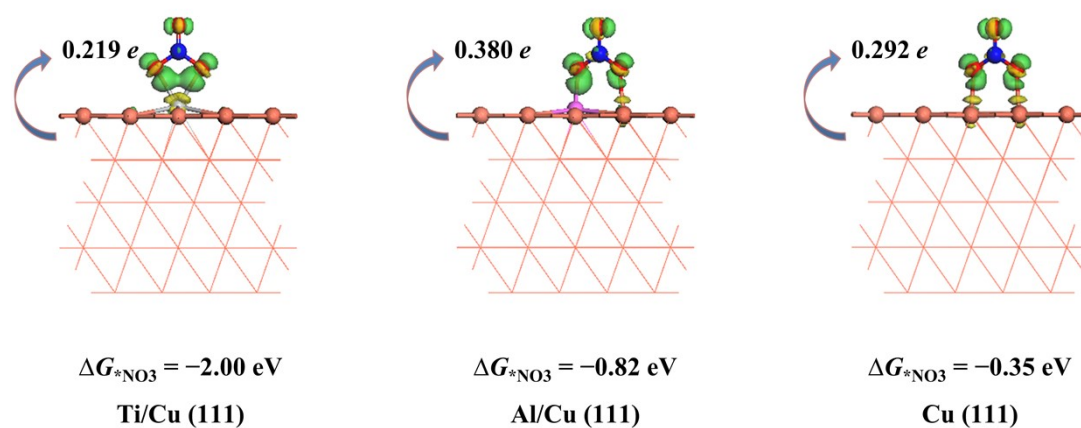

**Fig. S1** Adsorption configurations of  $NO_3^-$  on Ti/Cu (111), Al/Cu (111), and Cu (111). Yellow and green regions indicate electron depletion and accumulation.

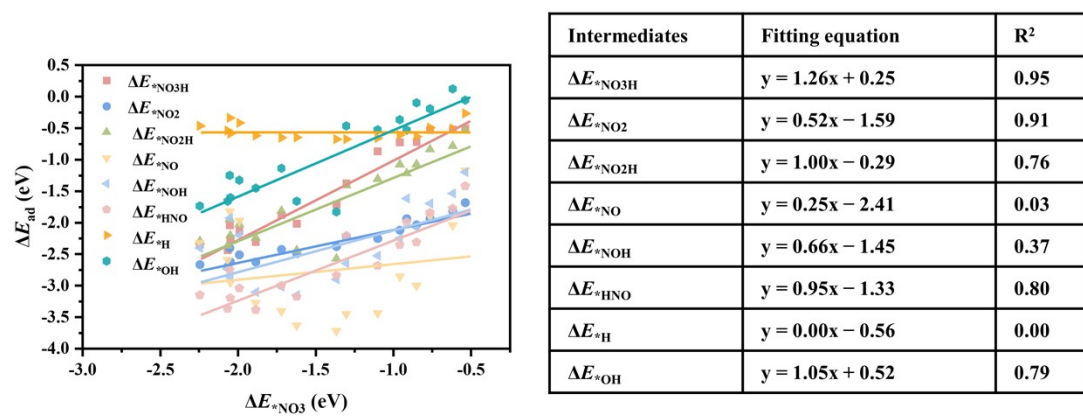

**Fig. S2** Relationships between the  $\Delta E_{ad}$  of  $NO_3RR$  intermediates and  $\Delta E_{*NO_3}$  on SAAs.

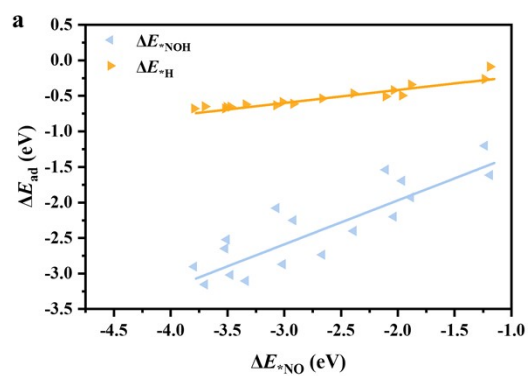

| Intermediates     | Fitting equation   | R <sup>2</sup> |
|-------------------|--------------------|----------------|
| $\Delta E_{*NOH}$ | $y = 0.62x - 0.73$ | 0.74           |
| $\Delta E_{*H}$   | $y = 0.18x - 0.05$ | 0.86           |

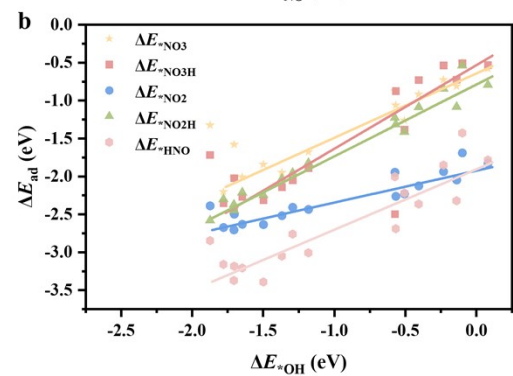

| Intermediates      | Fitting equation   | R <sup>2</sup> |
|--------------------|--------------------|----------------|
| $\Delta E_{*NO3}$  | $y = 0.85x - 0.61$ | 0.90           |
| $\Delta E_{*NO3H}$ | $y = 1.10x - 0.53$ | 0.94           |
| $\Delta E_{*NO2}$  | $y = 0.42x - 1.92$ | 0.82           |
| $\Delta E_{*NO2H}$ | $y = 0.95x - 0.79$ | 0.96           |
| $\Delta E_{*HNO}$  | $y = 0.80x - 1.91$ | 0.79           |

**Fig. S3** Relationships between  $\Delta E_{ad}$  of NO<sub>3</sub>RR intermediates and  $\Delta E_{*NO}$  (a) and  $\Delta E_{*OH}$  (b) on SAAs.

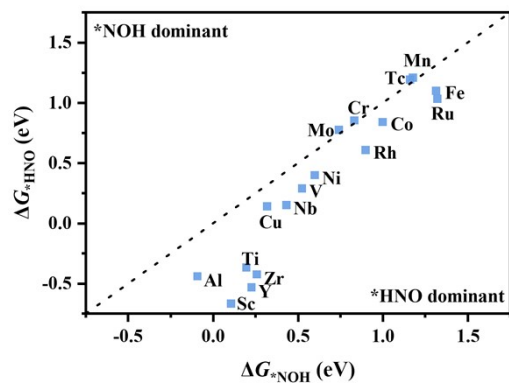

**Fig. S4** Comparison of  $\Delta G^*_{\text{NOH}}$  and  $\Delta G^*_{\text{HNO}}$  on SAAs.

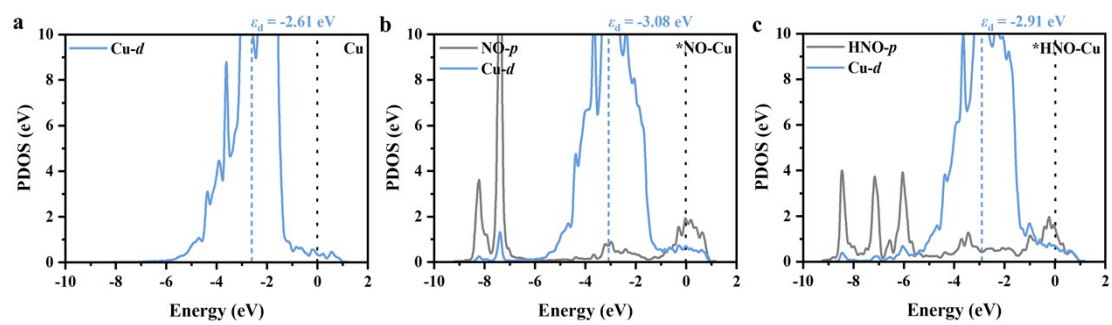

**Fig. S5** (a) PDOS of Cu (111). (b and c) PDOS of adsorbed \*NO and \*HNO on Cu (111). Blue dashed lines mark the Cu-*d* band center.

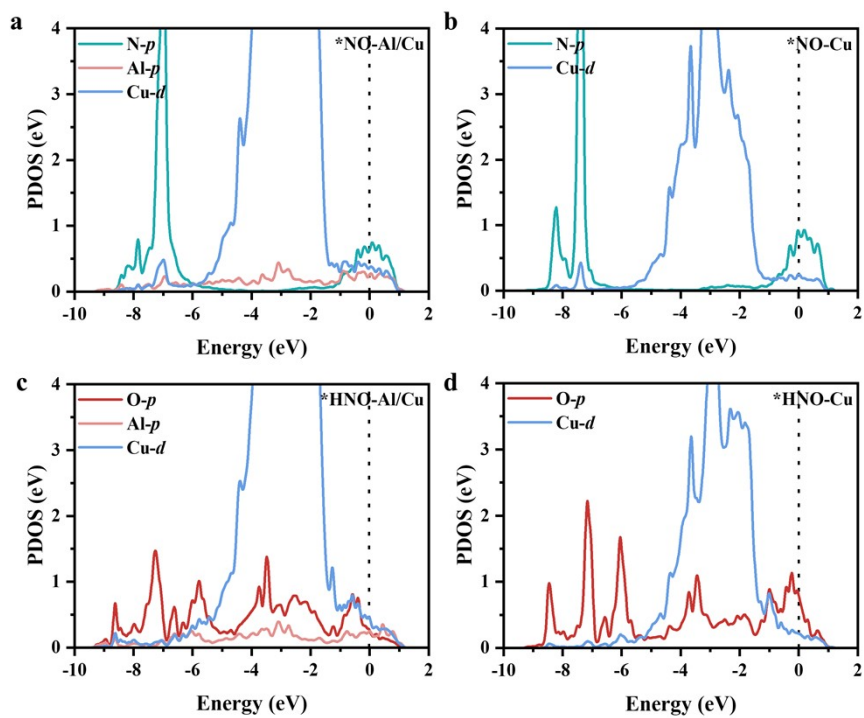

**Fig. S6** PDOS of N-*p* in \*NO (a and b) and O-*p* in \*HNO (c and d) on Al/Cu (111) and Cu (111).

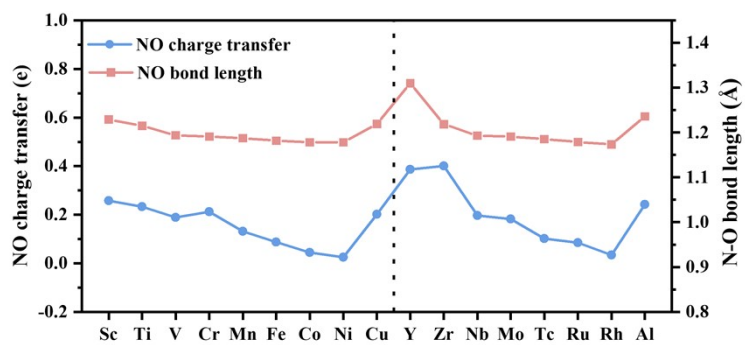

**Fig. S7** The number of electrons transferred from the catalyst surface to \*NO and the N-O bond length.

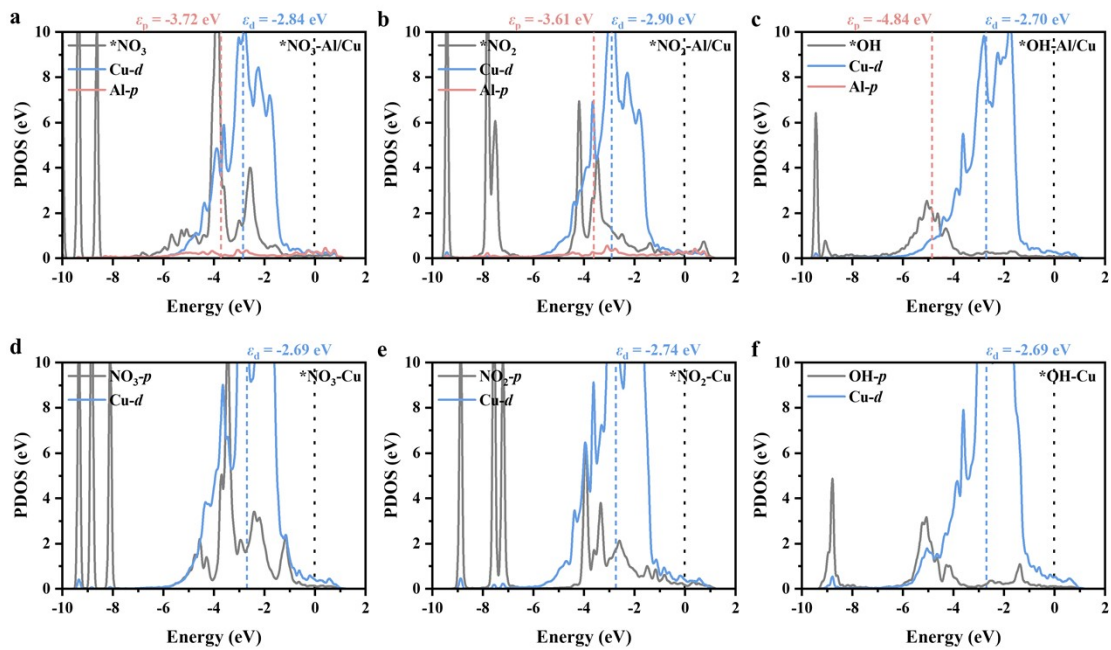

**Fig. S8** PDOS of adsorbed  $^*\text{NO}_3$  (a),  $^*\text{NO}_2$  (b), and  $^*\text{OH}$  (c) on Al/Cu (111). PDOS of adsorbed  $^*\text{NO}_3$  (d),  $^*\text{NO}_2$  (e), and  $^*\text{OH}$  (f) on Cu (111). Pink and blue dashed lines mark the Al-p and Cu-d band centers.

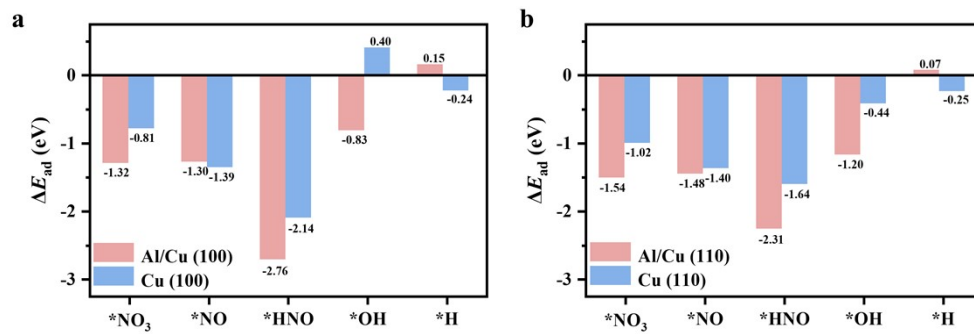

**Fig. S9**  $\Delta E_{ad}$  of NO<sub>3</sub><sup>-</sup>, NO, HNO, OH, and H on Al/Cu (100) and Cu (100) (a), and Al/Cu (110) and Cu (110) (b).

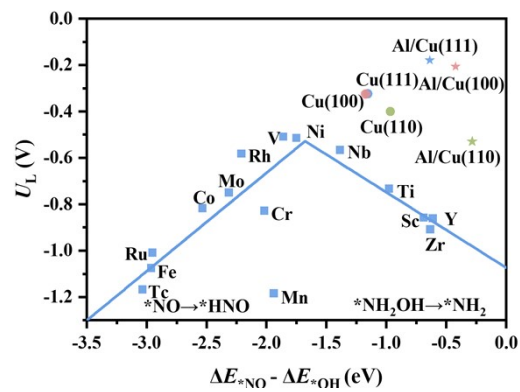

**Fig. S10** Facet-dependent positions of Cu (100), Al/Cu (100), Cu (110), and Al/Cu (110) on the NO<sub>3</sub>RR volcano plot constructed with the descriptor  $\Delta E^*_{NO} - \Delta E^*_{OH}$ .

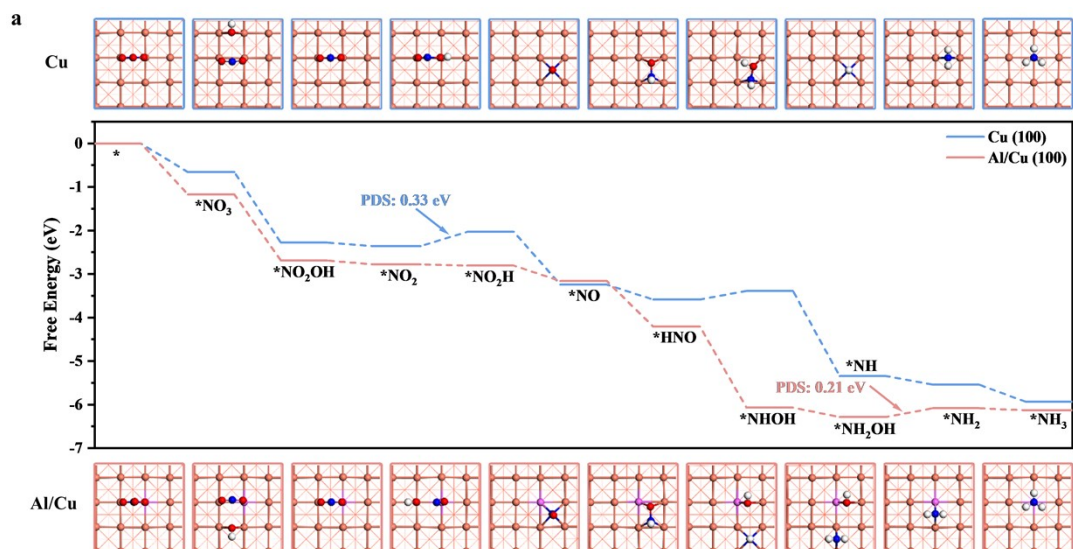

**Fig. S11**  $\Delta G$  diagrams and corresponding reaction intermediates during NO<sub>3</sub>RR on Cu (100) and Al/Cu (100).

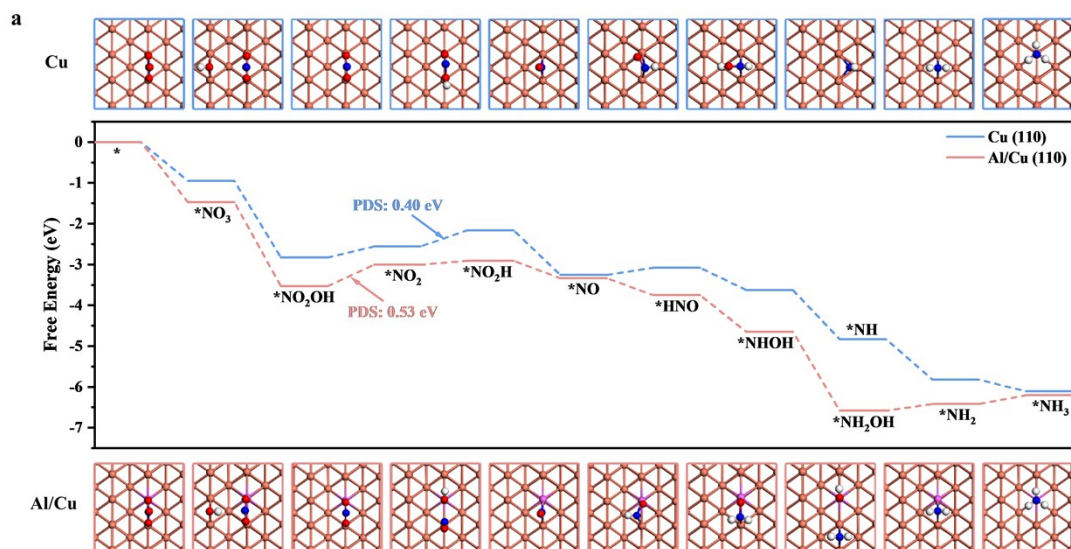

**Fig. S12**  $\Delta G$  diagrams and corresponding reaction intermediates during NO<sub>3</sub>RR on Cu (110) and Al/Cu (110).

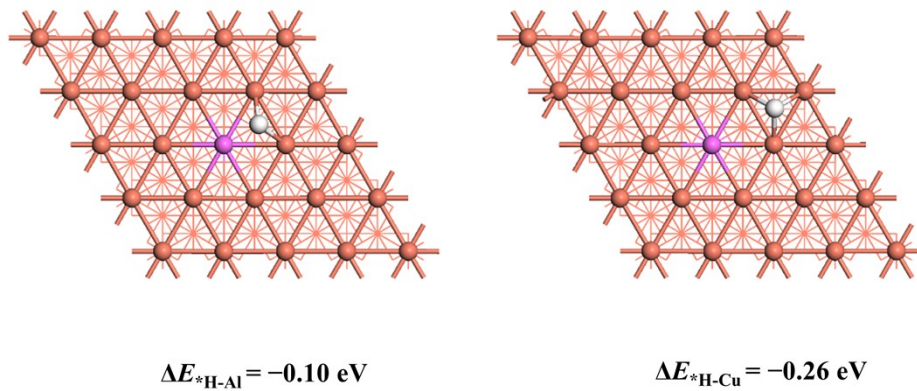

**Fig. S13** H adsorption configurations at Al site (left) and Cu site (right) on Al/Cu (111).

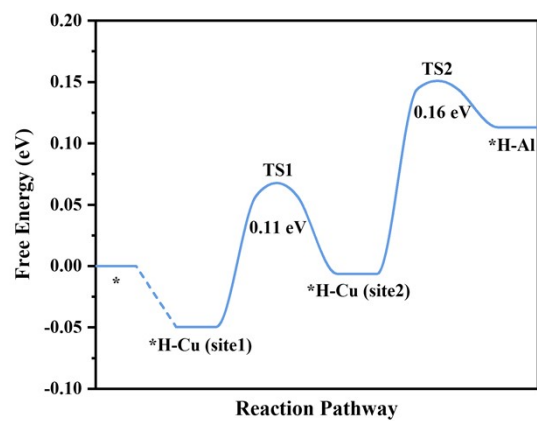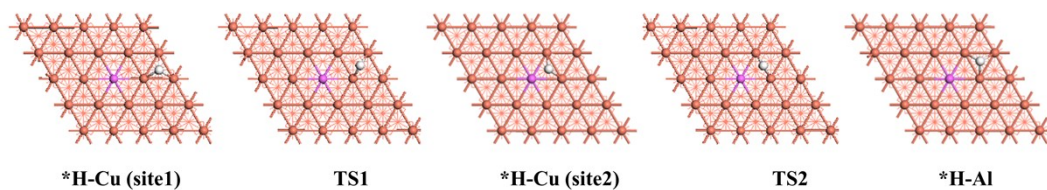

**Fig. S14**  $\Delta G$  diagrams and corresponding reaction intermediates during H spillover on Al/Cu (111).

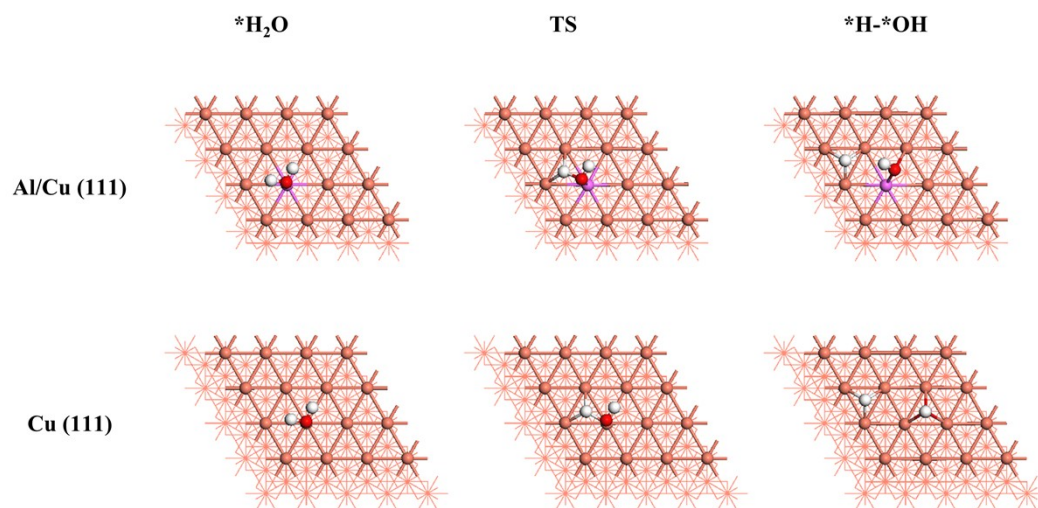

**Fig. S15** The corresponding reaction intermediates of  $\text{H}_2\text{O}$  dissociation on Al/Cu (111) and Cu (111).
